# Supplementary material for: Restoration of tropical dry forest: an analysis of constraints and successes across a highly threatened biome
Source: Frontiers journal article supplement (doi:10.3389/fenvs.2024.1458613), 2025-01-07
Supplement: Supplementary_file_1.docx [file Supplementary_file_1.docx]

**SUPPLEMENTARY FILE**

**Forest landscape restoration of a critical endangered ecosystem: An overview of worldwide efforts in tropical dry forest**

*Mesa-Sierra, Natalia1, de la Peña-Domene, Marinés1,2*, Campo, Julio2 & Giardina, Christian P.3*

**Figure S1.** PRISMA diagram of the steps followed during the systematic review.

**Table S1.** Description of the categories of the previous land use, restoration strategies and response variables reported by the studies reviewed. The elements (sub-category) that were included in each category and the number of studies in which they were included are specified.

| **Category** | **Sub-category** | **Number of studies** |
| --- | --- | --- |
| ***Previous land use*** | | |
| Cattle |  | 93 |
| Crops |  | 49 |
| Not applied |  | 41 |
| Mining |  | 18 |
| Not specified |  | 14 |
| Timber extraction |  | 14 |
| Fire |  | 8 |
| Intensive agro-forestry |  | 3 |
| Other | Non-timber products extraction | 3 |
| Dam construction | 1 |
| Lava flow | 1 |
| Sand extraction | 1 |
| Thirteenth-century stone city | 1 |
| Wasteland | 1 |
| War | 1 |
| ***Restoration strategy*** | | |
| Planting |  | 136 |
| Plating complementation | Fertilizer | 23 |
| Watering | 12 |
| Nurse tree | 7 |
| Mulch | 4 |
| Hydrogel | 2 |
| Shade | 2 |
| Thinning | 1 |
| Fire | 1 |
| Plant removal | Weed control | 18 |
| Grass removal | 12 |
| Plant removal | 5 |
| Herbicide | 4 |
| Fire | 1 |
| AMF Inoculation |  | 7 |
| Seed related | Seeding | 33 |
| Seed pellets | 2 |
| Topsoil |  | 9 |
| Soil plowing |  | 4 |
| Assisted Natural Regeneration |  | 9 |
| Enclosure |  | 15 |
| Other | Fire control | 1 |
| Orange waste | 1 |
| ***Response variables*** | | |
| Vegetation structure | Survival | 90 |
| Height | 49 |
| Germination | 39 |
| Growth | 35 |
| Diameter | 26 |
| Biomass | 31 |
| Root attributes | 23 |
| Density | 20 |
| Vegetation cover | 19 |
| Diameter increment | 18 |
| Height growth | 9 |
| Canopy cover | 8 |
| Recruitment | 8 |
| Leaf area | 4 |
| Crown attritutes | 3 |
| Seed banks attributes | 2 |
| Belowground biomass | 2 |
| Branches | 2 |
| Leaf production | 2 |
| Seedling establishment | 2 |
| Survival of germinated seeds | 2 |
| Fruit size | 1 |
| Resprouts | 1 |
| Seed size | 1 |
| Life/Growth forms | 1 |
| Functional attributes of the vegetation | Foliar N and P concentrations | 6 |
| Net photosynthesis | 3 |
| Regeneration | 2 |
| Resources allocation | 2 |
| Seed viability | 2 |
| Stomata openess | 2 |
| Changes in thermostable protein, amino acid and lipid concentration | 1 |
| Phenology | 1 |
| Stomatal conductance | 1 |
| Ecosystem functions | Aboveground carbon | 7 |
| Biomass (Besides plants) | 6 |
| Abundance (Besides plants) | 4 |
| Microclimate | 3 |
| Belowground carbon | 2 |
| Body condition | 1 |
| Dry weight (Besides plants) | 1 |
| Ecosystem C pools | 1 |
| Fire modeling | 1 |
| Mean Weight (Besides plants) | 1 |
| Spore density | 1 |
| Soil attributes | Soil nutrients (total N, available P) | 23 |
| pH | 17 |
| Soil moisture | 12 |
| Litter attributes | 11 |
| Soil organic C (SOC) | 8 |
| Bulk density | 6 |
| N-mineralization | 6 |
| Cation exchange capacity | 5 |
| C:N Ratio | 3 |
| Soil fertility | 3 |
| Soil CO2 flux | 2 |
| Use of mulch | 1 |
| Soil texture | 1 |
| Soil respiration | 1 |
| Soil coarse fraction | 1 |
| Soil salinity | 1 |
| Water holding capacity | 1 |
| Biotic interactions | Herbivory | 9 |
| Arbuscular mycorrhizal fungi (AMF) colonization | 5 |
| Seed removal | 4 |
| Species performance | 3 |
| Number of spores | 2 |
| Microbial activity | 2 |
| Net productivity | 2 |
| Breeding system | 1 |
| Organic matter decomposition | 1 |
| Pollination | 1 |
| Species requirements | 1 |
| Parrot recruitment | 1 |
| Biotic composition and diversity | Plant richness | 14 |
| Diversity | 11 |
| Richness (Besides plants) | 6 |
| Plant composition | 5 |
| Composition (Besides plants) | 4 |
| AMF Composition | 1 |
| AMF Richness | 1 |
| Arthropod communities | 1 |
| Services and social outcomes | Species values | 11 |
| Determinants of restoration program adoption | 9 |
| Economic Benefits | 5 |
| Restoration cost | 4 |
| Social benefits | 4 |
| Social perception of environmental changes | 4 |
| Capacity Development of GGW Communities | 2 |
| Local knowledge | 2 |
| Trees Protected on Land | 2 |
| Illegal harvesting of trees | 1 |
| Knowledge gaps | 1 |
| Fuel wood consumption | 2 |
| Seed Collection and Seedling Production | 1 |
| Sustainable Forest Management | 1 |
| Comunity monitoring | 1 |

**Table S2.** List of the 187 studies that were reviewed in this study by ecozone.

| **Ecorregion** | **Year** | **Author(s)** | **Title** |
| --- | --- | --- | --- |
| **Afrotropic** | 2003 | Asefa, D.T.; Oba, G.; Weladji, R.B. & Colman, J.E. | Asefa, D. T., Oba, G., Weladji, R. B., & Colman, J. E. (2003). An assessment of restoration of biodiversity in degraded high mountain grazing lands in northern Ethiopia. *Land degradation & development*, 14(1), 25-38. |
| 2006 | Birhane, E.; Teketay, D. & Barklund, P. | Actual and potential contribution of exclosures to enhance biodiversity of woody species in the drylands of Eastern Tigray. *Journal of the Drylands*, 1(2), 134-147. |
| Aerts, R.; Maes, W.; November, E.; Negussie, A.; Hermy, M. & Muys, B. | Restoring dry Afromontane forest using bird and nurse plant effects: direct sowing of Olea europaea ssp. cuspidata seeds. *Forest Ecology and Management*, 230(1-3), 23-31. |
| Aerts, R.; Mekuria, A.N.; Maes, W.; November, E.; Hermy, M. & Muys, B. | Survival of planted African wild olive seedlings in northern Ethiopian exclosures depends on planting season and shrub cover. *Journal of the Drylands*, 1(1), 64-71. |
| 2007 | Raddad, E.A.Y. | Ecophysiological and genetic variation in seedling traits and in first-year field performance of eight Acacia senegal provenances in the Blue Nile, Sudan. *New Forests*, 34(3), 207-222. |
| 2010 | Sanon, A.; Ndoye, F.; Baudoin, E.; Prin, Y.; Galiana, A. & Duponnois, R. | Management of the mycorrhizal soil infectivity to improve reforestation programs’ achievements in Sahelian ecosystems. *Current research, technology and education topics in applied microbiology and microbial biotechnology*, 1, 230-238. |
| Bognounou, F.; Thiombiano, A.; Oden, P.C. & Guinko, S. | Seed provenance and latitudinal gradient effects on seed germination capacity and seedling establishment of five indigenous species in Burkina Faso. *Tropical Ecology*, 51(2), 207. |
| 2011 | Olckers, T. | Biological control of Leucaena leucocephala (Lam.) de Wit (Fabaceae) in South Africa: a tale of opportunism, seed feeders and unanswered questions. *African Entomology*, 19(1), 356-365. |
| Danquah, J.A.; Appiah, M. & Ari, P. | Comparison of post-fire planted and natural dry semi-deciduous forest communities in Ghana. URI: http://hdl.handle.net/123456789/7159 |
| Haglund, E., Ndjeunga, J., Snook, L., & Pasternak, D. | Dry land tree management for improved household livelihoods: farmer managed natural regeneration in Niger. *Journal of environmental management*, 92(7), 1696-1705. |
| Brown, D.R., Dettmann, P., Rinaudo, T., Tefera, H., & Tofu, A. | Poverty alleviation and environmental restoration using the clean development mechanism: a case study from Humbo, Ethiopia. *Environmental management*, 48, 322-333. |
| Mekuria, W.; Veldkamp, E.; Corre, M.D. & Haile, M. | Restoration of ecosystem carbon stocks following exclosure establishment in communal grazing lands in Tigray, Ethiopia. *Soil Science Society of America Journal*, 75(1), 246-256. |
| Reubens, B.; Moeremans, C.; Poesen, J.; Nyssen, J.; Tewoldeberhan, S.; Franzel, S.; Deckers, J.; Orwa, C. & Muys, B. | Tree species selection for land rehabilitation in Ethiopia: from fragmented knowledge to an integrated multi-criteria decision approach. *Agroforestry systems*, 82, 303-330. |
| 2012 | Appiah, M. | Changes in plant species composition within a planted forest in a deciduous agroecosystem in Ghana. *Agroforestry systems*, 85, 57-74. |
| 2013 | Mekuria, W. | Conversion of communal grazing lands into exclosures restored soil properties in the semi-arid lowlands of Northern Ethiopia. *Arid Land Research and Management*, 27(2), 153-166. |
| Maharia, A.; Azalu A. & Sibhatu, A | Growth response of Juniperus procera (Hochst. ex Endl.) on Calcaric Cambisol and Eutric Regosol in the drylands of Northern Ethiopia. *International Journal of Plant, animal and environmental sciences*, 3(4),97-101. |
| 2014 | Mahari, A. & Giday, K. | Initial growth responses of five multipurpose tree species under moisture stressed environment, Northern Ethiopia: Implications for rehabilitation of degraded areas in the drylands. *Merit Research Journal of Agricultural Science and Soil Sciences*, 2(8), 104-110. |
| Yeboah, D.; Burton, A.J.; Storer, A.J. & Opuni-Frimpong, E. | Variation in wood density and carbon content of tropical plantation tree species from Ghana. *New Forests*, 45, 35-52. |
| 2015 | Sacande, M.; Berrahmouni, N. & Hargreaves, S. | Community participation at the heart of Africa's Great Green Wall restoration model 1, *Unasylva*, 66(245), 44. |
| MacFarlane, D.W.; Kinzer, A.T. & Banks, J.E. | Coupled human-natural regeneration of indigenous coastal dry forest in Kenya, *Forest Ecology and Management*, 354, 149-159. |
| Weston, P.; Hong, R.; Kabore, C. & Kull, C.A. | Farmer-Managed Natural Regeneration Enhances Rural Livelihoods in Dryland West Africa, *Environmental management*, 55(6), 1402-1417. |
| 2016 | Sacande, M. & Berrahmouni, N. | Community participation and ecological criteria for selecting species and restoring natural capital with native species in the Sahel, *Restoration Ecology*, 24(4), 479-488. |
| Dayamba, S.D.; Savadogo, P.; Diawara, S. & Sawadogo, L. | Perspectives in restoration: storage and pretreatments of seeds for better germination of Sudanian savanna-woodland species, *Journal of forestry research*, 27(4), 773-778. |
| Mussa, M.; Hashim, H. & Teha, M. | Rangeland degradation: Extent, impacts, and alternative restoration techniques in the rangelands of Ethiopia, *Tropical and Subtropical Agroecosystems*, 19(3). |
| 2017 | Kimiti, D.W.; Hodge, A-M.C.; Herrick, J.E.; Beh, A.W. & Abbott, L.E. | Rehabilitation of community-owned, mixed-use rangelands: lessons from the Ewaso ecosystem in Kenya, *Plant ecology*, 218, 23-37. |
| Noulèkoun, F.; Lamers, J.P.A.; Naab, J. & Khamzina, A. | Shoot and root responses of woody species to silvicultural management for afforestation of degraded croplands in the Sudano-Sahelian zone of Benin, *Forest Ecology and Management*, 385, 254-263. |
| Byg, A.; Novo, P.; Dinato, M.; Moges, A.; Tefera, T.; Balana, B.; Woldeamanuel, T. & Black, H. | Trees, soils, and warthogs–distribution of services and disservices from reforestation areas in Southern Ethiopia, *Forest Policy and Economics*, 84, 112-119. |
| 2018 | Wade, T.I.; Ndiaye, O.; Mauclaire, M.; Mbaye, B.; Sagna, M.; Guissé, A. & Goffner, D. | Biodiversity field trials to inform reforestation and natural resource management strategies along the African Great Green Wall in Senegal, *New forests*, 49, 341-362. |
| Ceci, P.; Sanogo, S.; Ambrose, E.; Sacande, M.; Sanou, L.; Adda, M. & Ulian, T. | SDG 15: Target 15.3 Reversing land degradation and desertification in Africa's drylands, *BGjournal*, 15(2), 19-22. |
| Bakhoum, N.; Fall, D.; Fall, F.; Diouf, F.; Hirsch, A. M.; Balachandar, D. & Diouf, D. | Senegalia senegal (synonym: Acacia senegal), its importance to sub-Saharan Africa, and its relationship with a wide range of symbiotic soil microorganisms, *South African Journal of Botany*, 119, 362-368. |
| 2019 | Winowiecki, L.A. | Achieving Food Security and Reducing Poverty through Land Restoration, URI: https://hdl.handle.net/20.500.11766/9453 |
| Chidumayo, E.N. | Long term impacts of crop cultivation and tree shading on Piliostigma thonningii (Schumach) Milne-Redhead population, growth and biomass production after charcoal production in central Zambia, *Global Ecology and Conservation*, 13, e00373. |
| Eisen, N. | Restoring the Commons: Joint Reforestation Governance in Kenya, (Doctoral dissertation, Harvard University). |
| Valencia, A.M. & Crossland, M. | Understanding landscape restoration options in Kenya, URL: https://www.globallandscapesforum.org/wp-content/uploads/2018/11/GLF-Brief-8_new1.pdf |
| 2020 | Alem, S. | Seed bury vs broadcast in direct seeding: their effects on the germination of different woody plant species, in a degraded semi-arid area, Southern Ethiopia, *Journal of Degraded and Mining Lands Management*, 7(2), 2041. |
| **Indomalaya** | 1998 | Maiti, S.K. & Saxena, N.C. | Biological reclamation of coalmine spoils without topsoil: an amendment study with domestic raw sewage and grass-legume mixture, *Journal of surface mining, reclamation and environment*, 12(2), 87-90. |
| 1999 | Singh, A. N. & Singh, J. S. | Biomass, net primary production and impact of bamboo plantation on soil redevelopment in a dry tropical region, *Forest Ecology and Management*, 119(1-3), 195-207. |
| 2001 | Singh, A. N. & Singh, J. S. | Comparative growth behaviour and leaf nutrient status of native trees planted on mine spoil with and without nutrient amendment, *Annals of Botany*, 87(6), 777-787. |
| 2002 | Blakesley, D.; Elliott, S.; Kuarak, C.; Navakitbumrung, P.; Zangkum, S. & Anusarnsunthorn, V. | Propagating framework tree species to restore seasonally dry tropical forest: implications of seasonal seed dispersal and dormancy, *Ecology and Management*, 164(1-3), 31-38. |
| Elliott, S.; Kuarak, C.; Navakitbumrung, P.; Zangkum, S.; Anusarnsunthorn, V. & Blakesley, D. | Propagating framework trees to restore seasonally dry tropical forest in northern Thailand, *New Forests*, 23, 63-70. |
| 2003 | Elliott, S.; Navakitbumrung, P.; Kuarak, C.; Zangkum, S.; Anusarnsunthorn, V. & Blakesley, D. | Selecting framework tree species for restoring seasonally dry tropical forests in northern Thailand based on field performance, *Forest Ecology and Management*, 184(1-3), 177-191. |
| 2004 | Singh, A. N.; Raghubanshi, A. S., & Singh, J. S. | Comparative performance and restoration potential of two Albizia species planted on mine spoil in a dry tropical region, India, *Ecological Engineering*, 22(2), 123-140. |
| Singh, A. N.; Raghubanshi, A. S., & Singh, J. S. | Impact of native tree plantations on mine spoil in a dry tropical environment, *Forest Ecology and Management*, 187(1), 49-60. |
| 2006 | Singh, A.N.; Zeng, D.H. & Chen, F.S. | Effect of young woody plantations on carbon and nutrient accretion rates in a redeveloping soil on coalmine spoil in a dry tropical environment, India, *Land Degradation & Development*, 17(1), 13-21. |
| Singh, A.N. & Singh, J.S. | Experiments on ecological restoration of coal mine spoil using native trees in a dry tropical environment, India: a synthesis, *New forests*, 31, 25-39. |
| 2007 | Kiyono, Y.; Oo, M.Z.; Oosumi, Y. & Rachman, I. | Tree biomass of planted forests in the Tropical Dry climatic zone: Values in the Tropical Dry climatic zones of the Union of Myanmar and the eastern part of Sumba Island in the Republic of Indonesia, *Japan Agricultural Research Quarterly: JARQ*, 41(4), 315-323. |
| 2010 | So, T.; Theilade, I. & Dell, B. | Conservation and utilization of threatened hardwood species through reforestation? an example of Afzelia xylocarpa (Kruz.) Craib and Dalbergia cochinchinensis Pierre in Cambodia, *Pacific Conservation Biology*, 16(2), 101-116. |
| Nayak, K.G. & Davidar, P. | Pollinator limitation and the effect of breeding systems on plant reproduction in forest fragments, *Acta Oecologica*, 36(2), 191-196. |
| Tigabu, M.; Savadogo, P.; Odén, P.C. & Xayvongsa, L. | Enrichment planting in a logged-over tropical mixed deciduous forest of Laos, *Journal of Forestry Research*, 21, 273-280. |
| Singh, G.; Bhati, M. & Rathod, T. | Use of tree seedlings for the phytoremediation of a municipal effluent used in dry areas of north-western India: Plant growth and nutrient uptake, *Ecological Engineering*, 36(10), 1299-1306. |
| 2012 | Takahashi, M.; Marod, D.; Panuthai, S. & Hirai, K. | Carbon cycling in teak plantations in comparison with seasonally dry tropical forests in Thailand, *Forest ecosystems-more than just trees*, 209-230. |
| 2013 | Sang, P.M.; Lamb, D.; Bonner, M. & Schmidt, S. | Carbon sequestration and soil fertility of tropical tree plantations and secondary forest established on degraded land, *Plant and Soil*, 362, 187-200. |
| Kukrety, S.; Gezan, S.; Jose, S. & Alavalapati, J.R.R. | Facilitating Establishment of Advance Regeneration of Pterocarpus santalinus L.-An Endangered Tree Species from India, *Restoration ecology*, 21(3), 372-379. |
| 2014 | Tripathi, S.N. & Raghubanshi, A.S. | Seedling growth of five tropical dry forest tree species in relation to light and nitrogen gradients, *Journal of Plant Ecology*, 7(3), 250-263. |
| 2015 | Maiti, S. K. & Maiti, D. | Ecological restoration of waste dumps by topsoil blanketing, coir-matting and seeding with grass–legume mixture, *Ecological Engineering*, 77, 74-84. |
| Singh, A. | Growth Performance of Native Tropical Tree Species on a Coal Mine Spoil on Singrauli Coalfields, India, *Int. J. Bioinform. Biomed. Eng*, 1, 16-19. |
| Rathore, V.S.; Singh, J.P.; Bhardwaj, S.; Nathawat, N.S.; Kumar, M. & Roy, M.M. | Potential of native shrubs Haloxylon salicornicum and Calligonum Polygonoides for restoration of degraded lands in arid western Rajasthan, India, *Environmental management*, 55, 205-216. |
| Jaganathan, G.K. & Liu, B. | Role of seed sowing time and microclimate on germination and seedling establishment of Dodonaea viscosa (Sapindaceae) in a seasonal dry tropical environment—an insight into restoration efforts, *Botany*, 93(1), 23-29. |
| 2016 | Varma, V.; Iyengar, S.B. & Sankaran, M. | Effects of nutrient addition and soil drainage on germination of N-fixing and non-N-fixing tropical dry forest tree species, *Plant Ecology*, 217(8), 1043-1054. |
| 2017 | Ahirwal, J.; Maiti, S.K. & Singh, A.K. | Changes in ecosystem carbon pool and soil CO2 flux following post-mine reclamation in dry tropical environment, India, *Science of the Total Environment*, 583, 153-162. |
| Ahirwal, J.; Maiti, S.K. & Reddy, M.S. | Development of carbon, nitrogen and phosphate stocks of reclaimed coal mine soil within 8 years after forestation with Prosopis juliflora (Sw.) Dc., *Catena*, *156*, 42-50. |
| Bhadouria, R.; Singh, R.; Srivastava, P.; Tripathi, S. & Raghubanshi, A.S. | Interactive effect of water and nutrient on survival and growth of tree seedlings of four dry tropical tree species under grass competition, *Tropical Ecology*, *58*(3), 611-621. |
| 2018 | Sangsupan, H.A.; Hibbs, D.E.; Withrow-Robinson, B.A. & Elliott, S. | Seed and microsite limitations of large-seeded, zoochorous trees in tropical forest restoration plantations in northern Thailand, *Forest Ecology and Management*, *419*, 91-100. |
| 2019 | Ganapathy, M. & Immanuel, R. | Agro-techniques for afforestation of degraded coastal agricultural lands with silk cotton ( Ceiba pentendra ( L .) Gaertn .), *Journal of Pharmacognosy and Phytochemistry*, *8*(2), 1587-1590. |
| Baqir, M.; Kothari, R. & Singh, R.P. | Fuel wood consumption, and its influence on forest biomass carbon stock and emission of carbon dioxide. A case study of Kahinaur, district Mau, Uttar Pradesh, India, *Biofuels*, *10*(1), 145-154. |
| Immanuel, R. | Screening of multipurpose tree seedlings for afforestation of degraded coastal agricultural lands, *Plant Archives*, *19*(2), 653-656. |
| **Neotropic** | 1993 | Gerhardt, K. | Tree seedling development in tropical dry abandoned pasture and secondary forest in Costa Rica, Journal of Vegetation Science, 4(1), 95-102. |
| 1995 | Gerhardt, K. & Fredriksson, D. | Biomass Allocation by Broad-Leaf Mahogany Seedlings, Swietenia macrophylla (King), in Abandoned Pasture and Secondary Dry Forest in Guanacaste, Costa Rica, *Biotropica*, 174-182. |
| Ray, G.J. & Brown, B.J. | Restoring Caribbean dry forest - Evaluation of tree propagation techniques, *Restoration ecology*, *3*(2), 86-94. |
| 1999 | Moline, A. | Tropical dry forest restoration in the Guanacaste Conservation Area, Costa Rica, *Restoration and Reclamation Review. University of Minnesota, Student On–Line Journal*. |
| 2001 | Engel, V.L. & Parrotta, J.A. | An evaluation of direct seeding for reforestation of degraded lands in central Sao Paulo state, Brazil, *Forest Ecology and Management*, *152*(1-3), 169-181. |
| 2002 | Czarnowski, M. | Suitability of native tree species for reforestation in the tropical dry forest of Costa Rica, (Doctoral dissertation). |
| 2003 | Allen, E.B.; Allen, M.F.; Egerton-Warburton, L.; Corkidi, L. & Gómez-Pompa, A. | Impacts of early‐and late‐seral mycorrhizae during restoration in seasonal tropical forest, Mexico, *Ecological Applications*, *13*(6), 1701-1717. |
| 2004 | Sanchez-Velasquez, L.R.; Quintero-Gardilla, S.; Aragon-Cruz, F. & Pineda-Lopez, M.R. | Nurses for Brosimum alicastrum reintroduction in secondary tropical dry forest, *Forest Ecology and Management*, *198*(1-3), 401-404. |
| Ceccon, E.; Sánchez, S. & Campo, J. | Tree seedling dynamics in two abandoned tropical dry forests of differing successional status in Yucatán, Mexico: a field experiment with N and P fertilization, *Plant ecology*, *170*, 277-285. |
| 2005 | Allen, M.F.; Allen, E.B. & Gómez‐Pompa, A. | Effects of mycorrhizae and nontarget organisms on restoration of a seasonal tropical forest in Quintana Roo, Mexico: factors limiting tree establishment, *Restoration Ecology*, *13*(2), 325-333. |
| Griscom, H.P.; Ashton, P.M.S. & Berlyn, G.P. | Seedling survival and growth of native tree species in pastures: Implications for dry tropical forest rehabilitation in central Panama, *Forest Ecology and Management*, *218*(1-3), 306-318. |
| 2006 | Pinto, A.S.; Bustamante, M.M.C.; da Silva, M.R.S.S.; Kisselle, K.W.; Brossard, M.; Kruger, R.; Zepp, R.G. & Burke, R.A. | Effects of different treatments of pasture restoration on soil trace gas emissions in the Cerrados of Central Brazil, *Earth Interactions*, *10*(1), 1-26. |
| Barajas-Guzman, M.G.; Campo, J. & Barradas, V.L. | Soil water, nutrient availability and sapling survival under organic and polyethylene mulch in a seasonally dry tropical forest, *Plant and Soil*, 287, 347-357. |
| Bonfil-Sanders, C.; Mendoza-Hernandez, P.E. & Ulloa-Nieto, J.A. | Root and callus development in cuttings of seven species of the genus Bursera, *Agrociencia*, *41*(1), 103-109. |
| Klemens, J.A.; Deacon, N.J. & Cavender-Bares, J.C. | Pasture recolonization by a tropical oak and the regeneration ecology of seasonally dry tropical forests. *Seasonally dry tropical forests: ecology and conservation*, 221-237. |
| 2008 | Carneiro, M.A.C.; Siqueira, J.O.; Moreira, F.M.D.S. & Soares, A.L.L. | Carbono orgânico, nitrogênio total, biomassa e atividade microbiana do solo em duas cronosseqüências de reabilitação após a mineração de bauxita, *Revista Brasileira de Ciência do Solo*, *32*, 621-632. |
| Vieira, D.L.M.; de Lima, V.V.; Sevilha, A.C. & Scariot, A. | Consequences of dry-season seed dispersal on seedling establishment of dry forest trees: Should we store seeds until the rains?, *Forest Ecology and Management*, *256*(3), 471-481. |
| Santiago-Garcia, Ricardo J.; Colon, Sandra Molina; Sollins, Phillip; Van Bloem, Skip J. | The Role of Nurse Trees in Mitigating Fire Effects on Tropical Dry Forest Restoration: A Case Study, *AMBIO: A Journal of the Human Environment*, *37*(7), 604-608. |
| 2009 | Griscom, H.P.; Griscom, B.W. & Ashton, M.S. | Forest Regeneration from Pasture in the Dry Tropics of Panama: Effects of Cattle, Exotic Grass, and Forested Riparia, *Restoration Ecology*, *17*(1), 117-126. |
| 2010 | Pais, M.P. & Varanda, E.M. | Arthropod recolonization in the restoration of a semideciduous forest in southeastern Brazil, *Neotropical entomology*, *39*, 198-206. |
| Bonilla-Moheno, M. & Holl, K.D. | Direct Seeding to Restore Tropical Mature-Forest Species in Areas of Slash-and-Burn Agriculture, *Restoration Ecology*, *18*, 438-445. |
| Castellanos-Castro, C. & Bonfil-Sanders, C. | Establecimiento y crecimiento inicial de estacas de tres especies de Bursera Jacq. ex L., *Revista mexicana de ciencias forestales*, *1*(2), 93-108. |
| Daley, B.F. | Neotropical dry forests of the Caribbean: Secondary forest dynamics and restoration in St. Croix, US Virgin Islands, (Doctoral dissertation). |
| Gamboa, A.M.; Hidalgo, C.; de Leon, F.; Etchevers, J.D.; Gallardo, J.F. & Campo, J. | Nutrient Addition Differentially Affects Soil Carbon Sequestration in Secondary Tropical Dry Forests: Early- versus Late-Succession Stages, *Restoration Ecology*, *18*(2), 252-260. |
| Bonfil-Sanders, C. & Trejo, I. | Plant propagation and the ecological restoration of Mexican tropical deciduous forests, *Ecological Restoration*, *28*(3), 369-376. |
| Yepes, A.P. & Villa, J.A. | Sucesión vegetal luego de un proceso de restauración ecológica en un fragmento de bosque seco tropical (La Pintada, Antioquia), *Revista lasallista de Investigación*, *7*(2), 24-34. |
| Williams-Linera, G. & Alvarez-Aquino, C. | Tropical dry forest landscape restoration in Central Veracruz, Mexico, *Ecological Restoration*, *28*(3), 259-261. |
| Elliott, S.B. | Tropical forest restoration: Seedball potential on Costa Rican farmland,URL: https://www.researchgate.net/profile/Scott-Elliott-7/publication/309717258_Tropical_Forest_Restoration_Seedball_Potential_on_Costa_Rican_Farmland/links/581e0b4408ae12715af5cd0e/Tropical-Forest-Restoration-Seedball-Potential-on-Costa-Rican-Farmland.pdf |
| 2011 | Cañadas López, A. & Roca Cedeño, A. | Can the reforestation projects stop the extraction of timber from the protected forest Chongón-Colonche?, *Conference: Development on the Margin*. |
| Diemont, S.A.W.; Bohn, J.L.; Rayome, D.D.; Kelsen, S.J. & Cheng, K. | Comparisons of Mayan forest management, restoration, and conservation, *Forest ecology and management*, *261*(10), 1696-1705. |
| Plath, M.; Mody, K.; Potvin, C. & Dorn, S. | Establishment of native tropical timber trees in monoculture and mixed-species plantations: small-scale effects on tree performance and insect herbivory, *Forest Ecology and Management*, *261*(3), 741-750. |
| Fragoso, F.P. & Varanda, E.M. | Flower-visiting insects of five tree species in a restored area of semideciduous seasonal forest, *Neotropical entomology*, *40*, 431-435. |
| Moreno-Casasola, P.; Infante Mata, D. & Madero-Vega, C. | Germinación y supervivencia de dos especies de acahual de selva baja para restaurar dunas costeras, *Revista mexicana de ciencias forestales*, *2*(6), 19-36. |
| Venturoli, F.; Fagg, C.W. & Felfili, J.M. | Initial development of Dipteryx alata Vogel and Myracrodruon urundeuva Allemao in enrichment planting in a semi-deciduous secondary forest, *Bioscience Journal*, *27*(3), 482-493. |
| Barajas-Guzmán, M.G. & Barradas, V.L. | Microclimate and sapling survival under organic and polyethylene mulch in a tropical dry deciduous forest, *Boletín de la Sociedad Botánica de México*, (88), 27-34. |
| Williams-Linera, G.; Alvarez-Aquino, C.; Suárez, A.; Blundo, C.; Smith-Ramírez, C.; Echeverria, C.; Cruz-Cruz, E.; Bolados, G.; Armesto, J.J. & Heinemann, K. | Experimental analysis of dryland forest restoration techniques, *Principles and practice of forest landscape restoration: case studies from the drylands of Latin America*, 131. |
| Dominguez‐Haydar, Y. & Armbrecht, I. | Response of ants and their seed removal in rehabilitation areas and forests at El Cerrejon coal mine in Colombia, *Restoration Ecology*, *19*(201), 178-184. |
| Griscom, H.P. & Ashton, M.S. | Restoration of dry tropical forests in Central America: a review of pattern and process, *Forest Ecology and Management*, *261*(10), 1564-1579. |
| Garen, E.J.; Saltonstall, K.; Ashton, M.S.; Slusser, J.L.; Mathias, S. & Hall, J.S. | The tree planting and protecting culture of cattle ranchers and small-scale agriculturalists in rural Panama: Opportunities for reforestation and land restoration, *Forest Ecology and Management*, *261*(10), 1684-1695. |
| Hall, J.S.; Love, B.E.; Garen, E.J.; Slusser, J.L.; Saltonstall, K.; Mathias, S.; van Breugel, M.; Ibarra, D.; Bork, E.W. & Spaner, D. | Tree plantations on farms: Evaluating growth and potential for success, *Forest Ecology and Management*, *261*(10), 1675-1683. |
| 2012 | Peguero, G.; Lanuza, O.R.; Save, R. & Espelta, J.M. | Allelopathic potential of the neotropical dry-forest tree Acacia pennatula Benth.: inhibition of seedling establishment exceeds facilitation under tree canopies, *Plant ecology*, *213*, 1945-1953. |
| Newton, A.C.; del Castillo, R.F.; Echeverria, C.; Geneletti, D.; Gonzalez-Espinosa, M.; Malizia, L.R.; Premoli, A.C.; Rey Benayas, J.M.; Smith-Ramirez, C. & Williams-Linera, G. | Forest Landscape Restoration in the Drylands of Latin America, *Ecology and Society*, *17*(1). |
| Rojas-Sandoval, J.; Melendez-Ackerman, E. & Fernandez, D.S. | Plant community dynamics of a tropical semi-arid system following experimental removals of an exotic grass, *Applied Vegetation Science*, *15*(4), 513-524. |
| Figueiredo, J.M.; Araujo, J.M.; Pereira, O.N.; Bakke, I.A. & Bakke, O.A. | Revegetation of degradaed Caatinga sites, *Journal of Tropical Forest Science*, 332-343. |
| Alvarez-Aquino, C. & Williams-Linera, G. | Seedling survival and growth of tree species: Site condition and seasonality in tropical dry forest restoration, *Botanical Sciences*, *90*(3), 341-351. |
| Wolfe, B.T. & Van Bloem, S.J. | Subtropical dry forest regeneration in grass-invaded areas of Puerto Rico: Understanding why Leucaena leucocephala dominates and native species fail, *Forest Ecology and Management*, *267*, 253-261. |
| Ceccon, E.; Almazo-Rogel, A.; Martinez-Romero, E. & Toledo, I. | The effect of inoculation of an indigenous bacteria on the early growth of Acacia farnesiana in a degraded area, *Cerne*, *18*, 49-57. |
| Huante, P.; Ceccon, E.; Orozco-Segovia, A.; Sanchez-Coronado, M.E.; Acosta, I. & Rincon, E. | The role of arbuscular mycorrhizal fungi on the early-stage restoration of seasonally dry tropical forest in Chamela, Mexico, *Revista Árvore*, *36*, 279-289. |
| 2013 | Barajas-Guzmán, M.G. & Barradas, V.L. | Costs and benefits of mulches application in the reforestation of tropical deciduous forests, *Botanical Sciences*, *91*(3), 363-370. |
| Gei, M.G. & Powers, J.S. | Do legumes and non-legumes tree species affect soil properties in unmanaged forests and plantations in Costa Rican dry forests?, *Soil Biology and Biochemistry*, *57*, 264-272. |
| Riedel, J.; Dorn, S.; Plath, M. & Mody, K. | Growth, herbivore distribution, and herbivore damage of timber trees in a tropical silvopastoral reforestation system, *Annals of forest science*, *70*, 75-86. |
| Fajardo, L.; Abarca, M.; Asmüssen, M.; Briceño-Linares, J.M. & Faría-Romero, M.A. | Improving fledgling recruitment and habitat quality for the yellow-shouldered parrot at Margarita Island, Venezuela, URL: https://www.conservationleadershipprogramme.org/media/2017/11/190107_Venzuela_FinalReport_Fledgelingrecruitment26habitatquality_31stJan2014.pdf |
| Morgan, M. & Shibu, J. | Increasing seed germination of Bursera graveolens, a promising tree for the restoration of tropical dry forests, *Tree Planters’ Notes*, *56*(1), 74-83. |
| Nunez-Cruz, A. & Bonfil-Sanders, C. | Initial establishment of three species of tropical dry forest in a degraded pasture: Effects of adding mulch and compost, *Agrociencia*, *47*(6), 609-620. |
| Encino-Ruiz, L.; Lindig-Cisneros, R.; Gomez-Romero, M. & Blanco-Garcia, A. | Performance of three tropical forest tree species in a test deciduous ecological restoration, *Botanical Sciences*, *91*(1), 107-114. |
| Castellanos-Castro, C. & Bonfil-Sanders, C. | Propagation of three Bursera species from cuttings, *Botanical Sciences*, *91*(2), 217-224. |
| Vieira, D.L.M.; Coutinho, A.G. & da Rocha, G.P.E. | Resprouting Ability of Dry Forest Tree Species after Disturbance Does Not Relate to Propagation Possibility by Stem and Root Cuttings, *Restoration Ecology*, *21*(3), 305-311. |
| Fajardo, L.; Rodriguez, J.P.; Gonzalez, V. & Briceno-Linares, J.M. | Restoration of a degraded tropical dry forest in Macanao, Venezuela, *Journal of Arid Environments*, *88*, 236-243. |
| 2014 | de Souza Gomes Guarino, E. & Scariot, A. | Direct seeding of dry forest tree species in abandoned pastures: effects of grass canopy and seed burial on germination, *Ecological Research*, *29*(3), 473-482. |
| Santilli, C. & Durigan, G. | Do alien species dominate plant communities undergoing restoration? A case study in the Brazilian savanna, *Scientia Forestalis*, *42*(103), 371-382. |
| Garcia, L.C.; Hobbs, R.J.; Maees dos Santos, F.A. & Rodrigues, Ricardo R. | Flower and fruit availability along a forest restoration gradient, *Biotropica*, *46*(1), 114-123. |
| Rojas Alvarado, C.A. & Calvo, E. | Forest Biomass, Carbon Stocks, and Macrofungal Dynamics: A Case Study in Costa Rica, *International Journal of Forestry Research*, *2014*. |
| Metzel, R. & Montagnini, F. | From Farm to Forest: Factors Associated with Protecting and Planting Trees in a Panamanian Agricultural Landscape, *Bois & Forets des Tropiques*, *322*, 3-15. |
| Cervantes, M.; Ceccon, E. & Bonfil-Sanders, C. | Germination of stored seeds of four tree species from the tropical fry forest of Morelos, Mexico, *Botanical Sciences*, *92*(2), 281-287. |
| Hernandez, Y.; Boege, K.; Lindig-Cisneros, R. & del-Val, E. | Lepidopteran herbivory in restored and successional sites in a tropical dry forest, *The Southwestern Naturalist*, *59*(1), 66-74. |
| Alvarado-Lopez, S.; Soriano, D.; Velazquez, N.; Orozco-Segovia, A. & Gamboa-deBuen, A. | Priming effects on seed germination in Tecoma stans (Bignoniaceae) and Cordia megalantha (Boraginaceae), two tropical deciduous tree species, *The Southwestern Naturalist*, *59*(1), 66-74. |
| Brooks, W.R. & Jordan, R.C. | Restoring Tropical Dry Forest Communities: Effects of Habitat Management and Outplantings on Composition and Structure, *Restoration ecology*, *22*(2), 160-168. |
| Alvarez-Aquino, C.; Barradas-Sanchez, L.; Ponce-Gonzalez, O. & Williams-Linera, G. | Soil seed band, seed removal, and germination in a seasonally dry tropical forest in Veracruz, Mexico, *Botanical Sciences*, *92*(1), 111-121. |
| Salinas-Peba, L.; Parra-Tabla, V.; Campo, J. & Munguía-Rosas, M.A. | Survival and growth of dominant tree seedlings in seasonally tropical dry forests of Yucatan: site and fertilization effects, *Journal of Plant Ecology*, *7*(5), 470-479. |
| 2015 | Ceccon, E.; Sanchez, I. & Powers, J.S. | Biological potential of four indigenous tree species from seasonally dry tropical forest for soil restoration, *Agroforestry Systems*, *89*, 455-467. |
| Diaz-Gustavo, N.; Martínez-Salvador, M.; García-Hernández, J.L.; Norzagaray-Campos, M.; Luna-González, A. & González-Ocampo, H.A. | Carbon sequestration of Caesalpinia platyloba S. Watt (Leguminosae)(Lott 1985) in the tropical deciduous forest, *PloS one*, *10*(5), e0125478. |
| González-Tokman, D. & Martínez-Garza, C. | Effect of ecological restoration on body condition of a predator, *Plos One*, *10*(7), e0133551. |
| Torres, R.C. & Renison, D. | Effects of vegetation and herbivores on regeneration of two tree species in a seasonally dry forest, *Journal of Arid Environments*, *121*, 59-66. |
| Fehling-Fraser, T.C. & Ceccon, E. | Macropropagation of Erythrina americana in a greenhouse: a potential tool for seasonally dry tropical forest restoration, *Revista Chapingo serie ciencias forestales y del ambiente*, *21*(1), 5-16. |
| Fajardo, L.; Lovera, M.; Arrindell, P.; Hugo Aguilar, V.; Hasmy, Z. & Cuenca, G. | Morphotype-based characterization of arbuscular mycorrhizal fungal communities in a restored tropical dry forest, Margarita island-Venezuela, *Revista de Biología Tropical*, *63*(3), 859-870. |
| Juan-Baeza, I.; Martinez-Garza, C. & del-Val, E. | Recovering More than Tree Cover: Herbivores and Herbivory in a Restored Tropical Dry Forest, *PloS one*, *10*(6), e0128583. |
| Vargas Figueroa, J.A.; Duque Palacio, O.L. & Torres Gonzalez, A.M. | Seed germination of four tree species from the tropical dry forest of Valle del Cauca, Colombia, *Revista de Biología Tropical*, *63*(1), 249-261. |
| Zulueta-Rodriguez, R.; Hernandez-Montiel, L.G.; Murillo-Amador, B.; Cordoba-Matson, M.V.; Lara, L. & Aleman Chavez, I. | Survival and growth of Jacaratia mexicana seedlings inoculated with arbuscular mycorrhizal fungi in a tropical dry forest, *Madera y bosques*, *21*(3), 161-167. |
| Ferreira Nunes, Y.R.; Alencar Fagundes, N.C.; Magalhaes Veloso, M.d.D.; Dias Gonzaga, A.P.; Santos Domingues, E.B.; Almeida, H.d.S.; Carvalho de Castro, G. & Santos, R. | Survival and growth of seven native tree species in a degraded area in tropical dry forest, northern Mina Gerais, *Revista Árvore*, *39*, 801-810. |
| Zahawi, R.A.; Eckert, C.; Chaves-Fallas, J.M.; Schwanitz, L.; Rosales, J.A. & Holl, K. | The effect of restoration treatment soils and parent tree on tropical forest tree seedling growth, *Open Journal of Forestry*, *5*(02), 154. |
| Gei, M.G & Powers, J.S. | The influence of seasonality and species effects on surface fine roots and nodulation in tropical legume tree plantations, *Plant and soil*, *388*, 187-196. |
| 2016 | Martínez-Garza, C.; Osorio-Beristain, M.; Alcalá-Martínez, R.E.; Valenzuela-Galván, D. & Mariano, N. | Ocho años de restauración experimental en las selvas estacionales de México, *Experiencias mexicanas en la restauración de los ecosistemas. Cuernavaca, Morelos, México: Universidad Nacional Autónoma de México, Centro Regional de Investigaciones Multidisciplinarias*, 385-406. |
| Torres, R.C. & Renison, D. | Indirect facilitation becomes stronger with seedling age in a degraded seasonally dry forest, *Acta Oecologica*, *70*, 138-143. |
| Duffy, B.A. | Trees in the Agricultural Matrix: Reforestation Processes in a Tropical Dry Landscape in Chinandega, Nicaragua, (Master dissertation). |
| 2017 | Mertens, J.; Germer, S.; Germer, J. & Sauerborn, J. | Comparison of soil amendments for reforestation with a native multipurpose tree under semiarid climate: Root and root tuber response of Spondias tuberosa, *Forest Ecology and Management*, *396*, 1-10. |
| Hernández-Oria, J.G.; Hawkins, R.I.Y.; Castaño Tostado, E. & Barradas, V.L. | Early establishment and survival of the neotropical dry deciduous forest tree Lysiloma microphyllum from mountainous Bajio Queretano, Mexico, *Journal of Tropical Ecology*, *33*(3), 213-227. |
| Ballina-Gomez, H.S.; Ruiz-Sanchez, E.; Ambriz-Parra, E. & Alvarado-Lopez, C.J. | Light and micorrhizal effect in seed germination of tropical dry forest tree species, *Madera y bosques*, *23*(3), 29-37. |
| Cardoso Ferreira, M. & Vieira, D.L.M. | Topsoil for restoration: Resprouting of root fragments and germination of pioneers trigger tropical dry forest regeneration, *Ecological engineering*, *103*, 1-12. |
| Mariano, N.A.; Martinez-Garza, C. & Alcala, R.E. | Differential herbivory and successional status in five tropical tree species, *Revista mexicana de biodiversidad*, *89*(4), 1107-1114. |
| Vargas-Figueroa, J.A. & Torres-González, A.M. | Germination and seed conservation of a pioneer species, Tecoma stans (Bignoniaceae), from tropical dry forest of Colombia, *Revista de Biología Tropical*, *66*(2), 918-936. |
| Treuer, T.L.; Choi, J.J.; Janzen, D.H.; Hallwachs, W.; Peréz‐Aviles, D.; Dobson, A.P.; Powers, J.S.; Shanks, L.C.; Werden, L.W. & Wilcove, D.S. | Low‐cost agricultural waste accelerates tropical forest regeneration, *Restoration ecology*, *26*(2), 275-283. |
| Gonzalez-Tokman, D.; Barradas, V.L.; Boege, K.; Dominguez, C.A.; del-Val, E.; Saucedo, E. & Martinez-Garza, C. | Performance of 11 tree species under different management treatments in restoration plantings in a tropical dry forest, *Restoration Ecology*, *26*(4), 642-649. |
| Castellanos Barliza, J.; Leon Pelaez, J.D. & Campo, J. | Recovery of biogeochemical processes in restored tropical dry forest on a coal mine spoil in La Guajira, Colombia, *Land Degradation & Development*, *29*(9), 3174-3183. |
| Werden, L.K.; Alvarado J, P.; Zarges, S.; Calderon, E.M.; Schilling, E.M.; Gutierrez L, M. & Powers, J.S. | Using soil amendments and plant functional traits to select native tropical dry forest species for the restoration of degraded Vertisols, *Journal of Applied Ecology*, *55*(2), 1019-1028. |
| 2019 | Pinheiro, F.M.; Nair, P.K.R.; Paulson, S.; Nair, V.D.; DeVore, J. & Tonucci, R.G. | An innovative, farmer initiative of silvopastoral restoration in a degraded semiarid Caatinga region of Brazil, In *4th World Congress on Agroforesry. CIRAD, Montpellier, Fr* (Vol. 708). |
| Carrasco-Carballido, V.; Martinez-Garza, C.; Jimenez-Hernandez, H.; Marquez-Torres, F. & Campo, J. | Effects of Initial Soil Properties on Three-Year Performance of Six Tree Species in Tropical Dry Forest Restoration Plantings, *Forests*, *10*(5), 428. |
| Dominguez-Haydar, Y.; Velasquez, E.; Carmona, J.; Lavelle, P.; Chavez, L.F. & Jiménez, J.J. | Evaluation of reclamation success in an open-pit coal mine using integrated soil physical, chemical and biological quality indicators, *Ecological Indicators*, *103*, 182-193. |
| Luna-Nieves, A.L.; Meave, J.A.; Gonzalez, E.J.; Cortes-Flores, J. & Ibarra-Manriquez, G. | Guiding seed source selection for the production of tropical dry forest trees: Coulteria platyloba as study model, *Forest Ecology and Management*, *446*, 105-114. |
| Mazon, M.; Aguirre, N.; Echeverria, C. & Aronson, J. | Monitoring attributes for ecological restoration in Latin America and the Caribbean region, *Restoration Ecology*, *27*(5), 992-999. |
| Diaz-Triana, E.J.; Torres-Rodriguez, S.; Munoz-P, L. & Avella-M, A. | Monitoring of ecological restoration in an interandean dry tropical forest (Huila, Colombia): program and preliminary results, *Caldasia*, *41*(1), 60. |
| Sierra-Escobar, J.A. & Ortíz-Correa, J.A. | Mycorrhizal symbiotic effectiveness as a tool for decision making in restauration of the tropical dry forest, *Revista Bionatura*, 4(1). |
| Castellanos Barliza, J.; Blanco Rodriguez, O.; Leon Pelaez, J.D. & Chavez, L.F. | Planted forests for open coal mine spoils rehabilitation in Colombian drylands: Contributions of fine litterfall through an age chronosequence, *Ecological Engineering*, *138*, 180-187. |
| Mendez-Toribio, M.; Benitez-Malvido, J.; Zermeno-Hernandez, I.E. & Castillo-Mandujano, J. | Removal of Climbing Plants and Soil Plowing as a Strategy to Enhance Forest Recovery in Tropical Dry Forests Old Field, *Ecological Restoration*, *37*(2), 113-122. |
| Gornish, E.; Arnold, H. & Fehmi, J. | Review of seed pelletizing strategies for arid land restoration, *Restoration Ecology*, *27*(6), 1206-1211. |
| Bravo Baeza, N.I.; Osorio Vélez, L.F.; Bravo Oviedo, F. & Martínez Bustamante, E. | Survival, growth and photosynthesis analysis of native forest species established in the tropical dry forest in Antioquia, Colombia, *Revista Facultad Nacional de Agronomía Medellín*, *72*(1), 8751-8761. |
| **Oceania** | 2000 | Cabin, R.J.; Weller, S.G.; Lorence, D.H.; Flynn, T.W.; Sakai, A.K.; Sandquist, D. & Hadway, L.J. | Effects of long-term ungulate exclusion and recent alien species control on the preservation and restoration of a Hawaiian tropical dry forest, *Conservation Biology*, *14*(2), 439-453. |
| 2002 | Cabin, R.J.; Weller, S.G.; Lorence, D.H.; Cordell, S.; Hadway, L.J.; Montgomery, R.; Goo, D. & Urakami, A. | Effects of light, alien grass, and native species additions on Hawaiian dry forest restoration, *Ecological Applications*, *12*(6), 1595-1610. |
| Cabin, R.J.; Weller, S.G.; Lorence, D.H.; Cordell, S. & Hadway, L.J. | Effects of microsite, water, weeding, and direct seeding on the regeneration of native and alien species within a Hawaiian dry forest preserve, *Biological conservation*, *104*(2), 181-190. |
| 2005 | Daehler, C.C. & Goergen, E.M. | Experimental Restoration of an Indigenous Hawaiian Grassland after Invasion by Buffel Grass (Cenchrus ciliaris), *Restoration Ecology*, *13*(2), 380-389. |
| 2008 | Cordell, S.; McClellan, M.; Carter, Y.Y. & Hadway, L.J. | Towards restoration of Hawaiian tropical dry forests: the Kaupulehu outplanting programme, *Pacific Conservation Biology*, *14*(4), 279-284. |
| 2009 | Brooks, S.; Cordell, S. & Perry, L. | Broadcast seeding as a potential tool to reestablish native species in degraded dry forest ecosystems in Hawaii, *Ecological restoration*, *27*(3), 300-305. |
| 2010 | Ammondt, S.A.E. | Ecological restoration of native plant communities in a Hawaiian tropical dry ecosystem dominated by the invasive grass Urochloa maxima, (Doctoral dissertation). |
| Thaxton, J.M.; Cole, T.C.; Cordell, S.; Cabin, R.J.; Sandquist, D.R. & Litton, C.M. | Native Species Regeneration Following Ungulate Exclusion and Nonnative Grass Removal in a Remnant Hawaiian Dry Forest, *Pacific Science*, *64*(4), 533-544. |
| 2012 | Perkins, K.S.; Nimmo, J.R. & Medeiros, A.C. | Effects of native forest restoration on soil hydraulic properties, Auwahi, Maui, Hawaiian Islands, *Geophysical Research Letters*, *39*(5). |
| Thaxton, J.M.; Cordell, S.; Cabin, R.J. & Sandquist, D.R. | Non-Native Grass Removal and Shade Increase Soil Moisture and Seedling Performance during Hawaiian Dry Forest Restoration, *Restoration Ecology*, *20*(4), 475-482. |
| Questad, E.J.; Thaxton, J.M. & Cordell, S. | Patterns and consequences of re-invasion into a Hawaiian dry forest restoration, *Biological Invasions*, *14*, 2573-2586. |
| 2013 | Ammondt, S.A.E.; Litton, C.M.; Ellsworth, L.M. & Leary, J.K. | Restoration of native plant communities in a Hawaiian dry lowland ecosystem dominated by the invasive grass Megathyrsus maximus, *Applied Vegetation Science*, *16*(1), 29-39. |
| 2014 | Medeiros, A.C.; Von Allmen, E.I. & Chimera, C.G. | Dry forest restoration and unassisted native tree seedling recruitment at Auwahi, Maui, *Pacific Science*, *68*(1), 33-45. |
| 2015 | Ellsworth, L.M.; Litton, C.M. & Leary, J.J.K. | Restoration impacts on fuels and fire potential in a dryland tropical ecosystem dominated by the invasive grass Megathyrsus maximus, *Restoration Ecology*, *23*(6), 955-963. |
| 2016 | Rovzar, C.M. | Conservation of Hawaii's dry forest: An application of habitat suitability modeling, GIS, and field methods, (Doctoral dissertation). |
| 2017 | Shiels, A.B.; Medeiros, A.C. & von Allmen, E.I. | Shifts in an invasive rodent community favoring Black rats (Rattus rattus) following restoration of native forest, *Restoration ecology*, *25*(5), 759-767. |

**Table S3.** Summary of the total area cover by tropical dry forest (TDF) in each biogeographic regions where field studies were established (De la Peña Domene et al. 2022a), the restored area reported in the studies reviewed, the percentage it represented, the mean area restored and the range (max and min values) of the restored plots area. All values are shown in hectares.

| **Biogeographic regions** | **Total area TDF** | **Restored** | **Percentage** | **Mean** | **Range** |
| --- | --- | --- | --- | --- | --- |
| Afrotropic | 108,190 | 10,253 | 9 | 513 | 0.0016 - 2300 |
| Indomalayan | 13,103 | 984 | 8 | 49 | 0.0243 - 550 |
| Neotropic | 39,371 | 4,404 | 11 | 64 | 0.0012 - 2231 |
| Oceania | 68 | 31 | 46 | 2 | 0.0064 - 12 |
| Total | 160,732 | 15,672 | 10* |  |  |

*Note** Percentage restored of the total area
